# Supplementary material for: Identification and Verification on Prognostic Index of Lower-Grade Glioma Immune-Related LncRNAs
Source: Front Oncol. 2020 Nov 23;10:578809. doi: 10.3389/fonc.2020.578809 (PMC7719803; doi:10.3389/fonc.2020.578809)
Supplement: Supplementary file 3 [file Table_3.xlsx]

## Sheet: Differentially expressed genes
Supplementary material File 3: GSEA gene list
id
DGCR9
DGCR10
CAMSAP3
TNK2
ARPP21
SLC39A1
TGIF1
RTP5
FAM114A1
GNG12
GRIA2
PYGL
MSN
IQGAP1
SYDE1
ELFN2
RASL10A
TMEM121B
ANG
SEMA6B
ANXA1
SCRT1
SPHKAP
KCNIP3
ECM2
GNG5
STEAP3
TNFRSF12A
CLIC1
IQGAP2
ECE1
MAST1
BRSK2
TBKBP1
SHISA7
CDHR1
RUNDC3A
EMP3
TSPOAP1
CD58
RIPPLY2
ELK3
PLEKHA4
SMPD3
CHI3L2
LINC00599
ZDHHC22
SHANK2
BTN2A2
VIM
ZNF217
JPH4
NSG2
LRRC20
SP100
JPH3
GDAP1L1
GNAL
NTNG2
FSTL1
SLC25A27
C1R
BCL7A
APOBEC3C
TMEM106C
UNC79
ANXA5
KIF21B
PRR36
PDZD4
PDPN
NRSN1
PTPRT
TIMP1
CELF5
UNC5A
ASIC1
RHOC
ABCC8
FAM155A
CCDC92B
S100A6
MYL12A
PDE2A
DLGAP1
FSD1
MCUB
HLA-DPB1
SQOR
HLA-DRB1
CASP6
SLC1A6
CNRIP1
METTL7B
LATS2
S100A4
PLSCR1
EPOP
PLBD1
PLCE1
SPTBN2
RCOR2
SNAP91
PKMP3
CD63
HDAC4
HERC5
HLA-DQA1
HLA-DRA
ANXA2P2
LAP3
CELF3
FAM57B
ANXA2
S100A11
ZDHHC12
KIF3A
FAM110B
GABRB3
CAPG
STK40
ZNF25
LRRC4
SMIM18
CDK5R1
TGFB2
INA
RAB32
CHI3L1
KCNIP2
PSD
CELSR3
SSTR2
TUB
HLA-DPA1
CDH10
PDCD1LG2
DPYD
IFITM10
SHD
HLA-DOA
MAP3K20
RAPGEFL1
AMER3
PIFO
GPR162
ANO6
PLPPR3
MADD
KIAA0895L
BID
DLG3
TWSG1
CACNG2
TAGLN2
KCNQ2
SCAMP5
OSMR
RTN4R
PAK5
LAMC1
SERPING1
PLOD1
EMILIN1
CSMD3
SNX32
CD74
KIAA0040
PLP2
LINC02440
SFRP4
ACTL6B
NOG
F11R
ADGRB3
MRC2
NMI
GBP1
KCNK3
CHGB
LAMB2
CDK2
UNC13A
CARMIL3
SERPINA1
DUSP26
DEAF1
RNF165
SPATS2L
REST
MAPK8IP2
GLMP
RNF112
CASKIN1
GDNF-AS1
DNM3
SRPX2
ATP6V1G2
FBLL1
RNF135
CHRNA4
GABBR1
TNFRSF11B
SERTAD3
TRIP10
NDE1
WASF1
CRYZ
FGL2
AP3B2
NAGA
ALDH5A1
FAXC
PDIA4
DPY19L1
TMEM63C
NAP1L3
GPR65
FAM171A2
P3H2
IGFBP2
FAM129A
CRY2
FCGR2A
ATCAY
HIST1H2BK
EVA1C
ADGRA1
2020-09-03
DIRAS3
HLA-DMA
EPB41L4A-AS1
NFATC2
C2orf27A
CPNE5
SELENON
PARP9
STX1B
CP
LINGO1
RASSF8
LGALS3BP
ALOX5AP
ITGA5
SERPINH1
SOD2
SWAP70
GLRB
LSP1
LRRC75B
GRIK2
LRRTM3
MYOF
MSR1
GPR173
DUSP10
CUX2
CAVIN1
EMILIN2
NMNAT2
TUBB6
GNS
KIAA1549L
NECTIN1
TENT5A
SLC43A3
CPLX1
DNALI1
RGR
VSTM2A
CARD16
PWAR6
APOL4
DRP2
WEE1
LRRTM4
GPX7
HOXC4
SMIM3
FUCA1
CRTAC1
CABP1
TRIM56
FLNC
TTC3
ANKRD24
UNC80
CHRNB2
CD302
DSCAML1
S1PR3
KANK2
NPC2
TMEFF2
GLIS3
SLITRK1
HLA-DQB1
TMCO4
LHFPL4
GADD45A
SATB1
SOX8
PCOLCE
CALU
KCNJ11
ASIC4
SLC16A4
PLAU
SERPINE1
WDR86
NAMPT
PAK3
SERPINA5
ADAM22
BEX1
RAP2A
ALDOC
HECW1
ITGB4
FHL3
WNT7B
CYBRD1
DGCR5
CRHR1
CXXC4
FGFRL1
PHACTR1
ATP8A1
CRNDE
S100A2
HLA-DRB5
SAMD9L
FLJ16779
PLAUR
GIMAP2
LHFPL2
RIMS2
DPYSL4
EMP1
KIF3C
HLA-DMB
ARFGEF3
LINC02381
TMEM151B
CSDC2
CHGA
ANK1
CGREF1
BMP2
CMTM3
TNFAIP6
FCGR3A
TMSB4X
OLFML3
SGSM1
KLHL25
ST8SIA3
PIANP
CD44
SLC4A2
CA10
TNFRSF1A
KDELC2
DLL3
REPS2
TEF
RGMB
CNTNAP2
MAGEH1
CSMD1
LINC02559
HAR1A
HSPB1
S100A3
CLCF1
CIITA
INSM2
ADGRE5
LINC00634
MOAP1
GPX8
GLRA3
SLIT1
RPRM
HSF4
SLC2A10
RGS16
HDAC1
CTSS
SVOP
PRDX6
CTF1
NAPSB
CPVL
C1RL
DLGAP3
ADGRB1
CYTL1
GALM
SEZ6L
FXYD6
MYD88
PPFIA3
TMEM271
CASP1
FHDC1
YPEL4
TRIP6
MAPT
ABCC3
BTBD17
HLA-DQB2
GLUD1
IDI1
WASF2
TMBIM1
MATN2
CPQ
SHKBP1
CTSC
LRAT
GPM6A
TUBA1C
DOK4
IGFBP5
RAPGEF4
STAT5A
C1S
FAM133A
CNN3
MN1
SCN1A
AGTRAP
SLC7A7
RND1
SPRY1
CLIC4
LY96
SERPINB1
GDAP1
MTMR11
TEAD2
RAB34
APOBR
BGN
PLOD2
ADCY5
GPRIN1
AMH
CHST1
ITGA2
VAV3
PTGS1
H2AFY2
SLC1A1
PODXL2
RAB6B
ARHGAP18
ARHGEF17
COL4A2
CFI
DOCK3
GRIA4
GNG4
LRRN4CL
TMEM176B
CBLN1
CHRM4
DOK6
FLNA
SSTR1
CACNA2D1
PPP3CB
EN1
NEK6
MYT1
ADA2
MGP
FXYD5
SBK1
CCL5
CADM2
PKIB
XKR8
LINC00672
GRIN3A
RAC2
DLL1
FUT9
MAP2
FCHSD2
XKR7
NRXN1
MAP3K7CL
JUN
RTN1
SPRY2
SHANK3
MMP14
VAMP5
C14orf132
NXPH1
PLAT
ACAP3
FAM19A2
ADGRV1
COL4A1
SEC31B
SPOCD1
LTBP1
CKMT1B
ITGB1
UNC93B1
ELAVL2
BASP1
CALHM6
HRH3
2020-03-04
COLEC12
RDH10
HSPB1P1
TMEM179
HLA-DRB6
LPAR6
ACSL6
FAIM2
C2orf80
PARP14
MGAT3
RNU6-353P
TMEM255A
LAIR1
PCDH7
FTL
FBP1
USP43
MMD2
GPNMB
IGFN1
EVI2B
WLS
FAM20C
IGF2BP2
ELAVL4
FBXO32
RPS6KA1
SPRN
HSPA7
YBX3
GSDMD
TYMP
TMEM121
HLA-A
CRISPLD1
TBC1D10A
LRRC25
PRSS35
DSCAM
SLC47A2
FILIP1L
LTF
GABRA3
FGF12
TCEAL2
LHX5
RNASE2
COL8A2
ASIC3
PROS1
GABBR2
FCGBP
MARVELD1
EMILIN3
GEM
HMOX1
FERMT1
SMOC1
COL8A1
FOXJ1
TMEM196
MMP24
MS4A6A
ARSD
SLC15A3
GRID1
LYN
GALNT13
ALOX5
BSN
LGALS1
KHDRBS2
DLG4
COTL1
DDIT4L
B3GNT7
SCN8A
AMZ1
PEA15
FUCA2
SOD3
PTPRC
HLA-B
PCDH15
GAREM2
CPLX2
PSMB9
HCLS1
TMEM100
CTTNBP2
GABRG2
ARID5A
CAV1
PNCK
ISX-AS1
FBLN5
GPR27
EEPD1
HK2
DGCR6
PSRC1
HIST1H1C
HLA-H
DCX
PRKCE
DEPP1
CDH18
TNC
NNMT
B3GALT2
SNTG1
LHX5-AS1
CDK5R2
HOTAIRM1
KCNJ9
GPR183
CXCL10
SULF2
PNMA3
TMEM246
HAPLN1
RNASE6
GRIN1
TLR2
INSYN1
FCGRT
PLS3
DGKB
FBXO41
PID1
PPIC
ARHGDIB
L1CAM
MST1
CSPG5
MYT1L
EFEMP2
SHISAL1
DACH2
TNR
SRRM3
ADD2
GDF15
B2M
KCNC1
CBLN2
CALD1
RAB33A
RARRES2
SLC11A1
FCER1G
CLEC7A
SERTAD1
SMC4
S100A10
FGFBP3
SPATA6
LRRC4C
TSPO
SLC8A2
LINC02593
SCN3B
CACNA1A
STAT1
C5AR1
NRXN2
2020-09-05
DOCK7
FMOD
PIRT
RAB3IP
SASH3
SLC1A5
GLIPR1
SOCS3
MFAP4
CDKN2C
CTSZ
SLC25A43
GFRA1
HTR2A
MYO5A
VAMP8
CYSTM1
SRRM4
DCTD
SIGLEC14
GBP2
FABP5
CDH22
EPHB1
PDLIM1
FOSL1
LINC00643
HCP5
OLIG1
SEMA4A
ATF3
CAMK2N2
SYNGR1
CLVS2
ICAM1
SECTM1
LOXL2
GALNT16
RGS11
MYO1F
STXBP1
RASGEF1C
FLRT1
IL18
OMG
AEBP1
RAB3C
RAP1GAP
HLA-DQA2
SCG3
RHBDL1
COL26A1
GABRD
VASN
WWTR1
INPP5D
AQP5
COL6A2
VWA5B2
MIAT
PLCB1
ARHGDIG
LPCAT2
MAGEE1
TNNT1
CD163
NTN4
EHD3
DISP3
ZFP36L2
MLLT11
TGFBR2
C3
PDLIM4
VEPH1
PPCS
IRF7
LGR6
ITGB2
MAN1C1
SLC8A3
DMRTA2
EHD2
SYP
COL1A2
TMEM176A
NEU4
NAP1L2
MEGF11
IFI16
YJEFN3
CHST6
CACNA1E
CA3
GSN
STUM
SH3GL2
PSMB8
G0S2
TTC9B
SHANK1
BST2
SOCS2
MIR6071
FRRS1L
PLIN3
IGFBP7
TMSB4XP8
TBXAS1
ELMO1
OAS2
ATP1A3
SFRP2
TOX
FBXL16
KAT2A
OAS1
MIR7158
IL13RA1
SCGB1D2
SCRT2
LINC01351
C1orf61
PLPPR1
MCAM
TAGLN3
RBP1
TEAD4
CD86
GMPR
C1orf162
APOL1
LHFPL6
TMEM35A
TEX26
JAG1
FBXO17
ABI3
SLC6A1
RIMS1
REEP1
CD248
GRIA3
UBE2QL1
HEY1
PHYHIPL
KCNT1
NPNT
STAC
CYBA
FAM163B
HIST1H2AC
GBP3
KIF1A
AR
IQSEC3
KIF2C
SUSD4
ARPC1B
FNBP1L
NEUROD1
KCNN1
ACAA2
PMP22
MMP2
LCNL1
HLA-F
KCNB1
DENND2A
SCD5
MGAT5B
TP73-AS1
CAPN5
TYROBP
LAT2
CD93
HSPB6
WDR38
FAM181A
PLEK
HAVCR2
GPSM3
FN1
SLC1A4
HLA-C
C2CD4C
LGALS3
THY1
FERMT3
C7orf57
HLF
NDRG4
C1orf226
NKAIN1
PDGFA
FAM81A
ACTN1
CEP170B
CNTN3
NKAIN4
LRRTM2
IL13RA2
FKBP9
KLRC4
CACNA2D3
CDC20
CCDC8
CD300A
C1QB
SCD
KLRC3
CORO6
CELF4
SCIN
FYB1
COL1A1
KLRC2
MX1
LUM
SLC24A3
TNFRSF1B
SYN1
CDCA8
PTPRN2
ITGB8
PRRT1
OLIG2
CHRM1
IGLV1-47
HTR1A
C21orf62
PTX3
CYP27A1
B3GNT9
PDLIM3
VSTM2B
GOLGA8B
ENO2
MIR1249
LCP1
MIR4697HG
C1QA
NGFR
HES6
PIPOX
CD37
RNU6-277P
HOXD9
SYT4
MEOX2
TRIM22
PTGFRN
LYZ
EYA2
NPTXR
EFEMP1
FPR3
KIF26A
KIF4A
SLA
C9orf64
LRTM2
CD53
HMX1
GALNT9
OPCML
SEZ6L2
ASAP3
CRB2
LITAF
LRRN1
CXCR4
AGAP2
TSPYL2
HIP1R
UCP2
DPEP1
OTOS
AGAP2-AS1
CACNG4
SPI1
CD4
PLA2G5
C1QC
CDH13
BEST3
CNNM1
CCNB1
BTN3A2
OPHN1
LINC00461
SCN2A
FKBP10
ADAM11
RGS7
RFPL1S
ZFR2
TEKT1
COL5A2
ADM
SOX9
HR
HAMP
DUSP9
PDIA2
MIR3151
PRDM8
CTHRC1
LINC02587
TCTEX1D1
HMGCS1
SYT16
C2orf40
NEGR1
FPR1
SKAP2
TFCP2L1
SLC2A13
COL3A1
SEZ6
PNMA8B
TREM2
MIR770
LAPTM5
MT2P1
WSCD2
HSPG2
BRINP2
MOXD1
ANGPTL2
RPH3A
CPM
MYORG
RASSF2
IFITM3
HOXA5
COPZ2
PRRT2
AMOTL2
FAM19A1
SCN3A
SDC4
SYK
RHBDL3
NDRG2
TMEM132D
BRINP1
CYBB
YAP1
C3AR1
FKBP5
CCL2
NELL1
OLR1
SEL1L3
BCAT1
FAM222A
SNAP25
NECAB2
DRAXIN
DDR2
KCNQ5
GPR17
CAMK4
TNFRSF19
C4B
THEMIS2
LHFPL3
FOXD3-AS1
VWF
CACNA1B
TM4SF1
GPR158
MT1L
MTATP6P1
LY6H
SAPCD2
SNCB
KCNC2
TOX3
ENHO
C1QTNF4
LILRB4
CAMKV
AQP1
EYA1
SLC7A14
LGALS9
IFI6
MAOB
VIPR2
APLN
ZFP36
PCSK2
HSPA12A
CEBPA
RTN4RL2
CASQ1
SPP1
FAM183A
CACNG8
POSTN
RIMS4
CALN1
MS4A4A
CMTM5
FSTL5
CCR1
HES5
GPC4
NPPA
PI16
TCIM
TRIM67
RBFOX3
GADD45B
HMGA1P7
SLC4A10
FOXD1
GFAP
MATK
LRIG1
USH1C
F3
ISG15
CEND1
LIMS2
APBB1IP
OLFM1
KIF5C
GUCY1A1
IGHA1
MYH7
BRINP3
SLC22A6
CPE
TMEM132B
NKD1
SCN2B
SLC25A48
CEBPD
ETNPPL
IGFBP3
VWA1
PBXIP1
IGHG2
BEX2
PTAFR
SLC12A5
CYR61
IGLC2
ASPHD1
LINC01105
ATOH8
GAD1
RAB3A
FOXG1
RGS1
ANKRD22
PKIA
VAX2
PRKCB
HIST3H2A
F2RL1
ASF1B
PTTG1
GRIA1
HPCAL4
HCST
DDN
SNX22
ST6GAL2
C1orf194
ATP8A2
MS4A7
GABRB2
TESPA1
LY86
PGF
NFIA-AS2
FBLN1
C4A
SEC61G
TMIGD3
KIF5A
BCAN
IGLC3
FAM84B
ARL4C
CD14
CLU
ADCYAP1R1
RGS7BP
VCAM1
PCDHGC4
SMIM10L2B
SYNM
JUNB
CNTFR
RNU6-529P
FOS
PTPN5
CD99
IGF2
STMN2
CNGA3
LAMB1
TMEM119
IGKC
PEG10
AMPH
OLFML2B
KCNJ3
GOLGA7B
TMEM130
IGKV3-20
CA11
RAP1GAP2
SYT13
PRLHR
ROBO1
IGHG1
NEUROD6
PTPRN
NPM2
DOC2A
ARC
CABLES1
TMEM155
F13A1
MT2A
LMO3
SNCG
GABRA1
ETV1
LEFTY2
MFSD4A
DIRAS2
MEG3
CALCRL
RARRES3
PPP2R2C
HES4
CD24
TSTD1
OXTR
SOX4
AIF1
BHLHE41
STX1A
PRKCG
MPPED1
PRKAR1B
NEURL1
SLC6A7
ATP2B3
EGR1
NGB
SLC1A2
PVALB
CACNG3
CHD5
UGT8
PCSK1N
IGHG3
SELPLG
CAMK2A
C11orf87
DUSP1
KLHDC8A
MT1M
SLN
NSG1
ICAM5
LPL
SULT4A1
NCAN
RBFOX1
VSTM2L
EEF1A2
S100A9
MAL2
NAPB
VSIG4
DNM1
COL9A3
HSPA6
CCK
PHYHIP
TGFBI
SPRY4
GABRG1
CALY
CTSH
NEFM
SULF1
RIT2
MYBL2
NKAIN3-IT1
SYNPR
LUZP2
MT-TF
SLC6A17
KCNJ4
SERPINI1
APLNR
TPX2
PDGFRA
RIMS3
SYN2
SV2B
KCNH3
PACSIN1
KCNE5
SYT1
CREG2
SYT7
SYT5
C1QL3
NRGN
TUBB4A
ID3
SELL
CBR1
MT1E
NUSAP1
PADI2
HPSE2
UBE2C
NEFL
VSNL1
SYNGR3
CAMK1G
RAMP3
EGR2
TOP2A
GDA
SHISA6
TPPP3
SHC3
RGS4
SLC17A7
CRYM
HPCA
SUSD5
FXYD7
GJA1
NTSR2
SST
